# Supplementary material
Source: Royal Society of Chemistry journal article supplement (doi:10.1039/d6ta00827e)
Supplement: d6ta00827e1.pdf [file d6ta00827e1.pdf]

## SUPPLEMENTARY INFORMATI

### **Fluorine Migration Regulation for Direct Regeneration of High-Nickel Cathode Scraps**

Yongshun Bao,<sup>1,2</sup> Binglei Jiao,<sup>3</sup> Thangavelu Dhanasekaran<sup>1</sup>, Qiao Zhang,<sup>3</sup> Jinxing Chen,<sup>3</sup>  
Guiling Wang,<sup>1\*</sup> Panpan Xu<sup>2\*</sup>

<sup>1</sup> Key Laboratory of Superlight Materials and Surface Technology of Ministry of Education, College of Materials Science and Chemical Engineering, Harbin Engineering University, Harbin 150001, China

<sup>2</sup>Soochow Institute for Energy and Materials Innovations, College of Energy, Soochow University, Suzhou, 215006 P. R. China

<sup>3</sup>Institute of Functional Nano & Soft Materials (FUNSOM), Jiangsu Key Laboratory for Carbon-Based Functional Materials & Devices, Soochow University, Suzhou, 215123, Jiangsu, P. R. China

Corresponding to [guilingwang@hrbeu.edu.cn](mailto:guilingwang@hrbeu.edu.cn); [xupanpan@suda.edu.cn](mailto:xupanpan@suda.edu.cn)

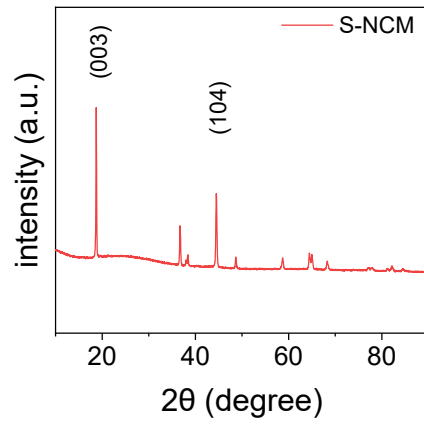

**Figure S1.** X-ray diffraction pattern of S-NCM

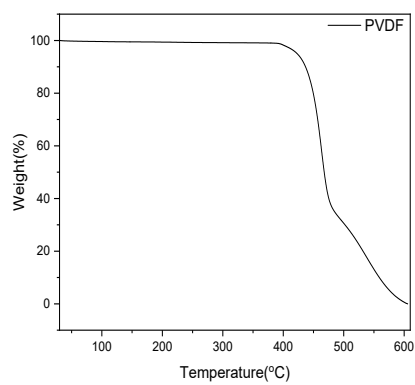

**Figure S2.** Thermogravimetric (TG) curve of PVDF measured under an air atmosphere.

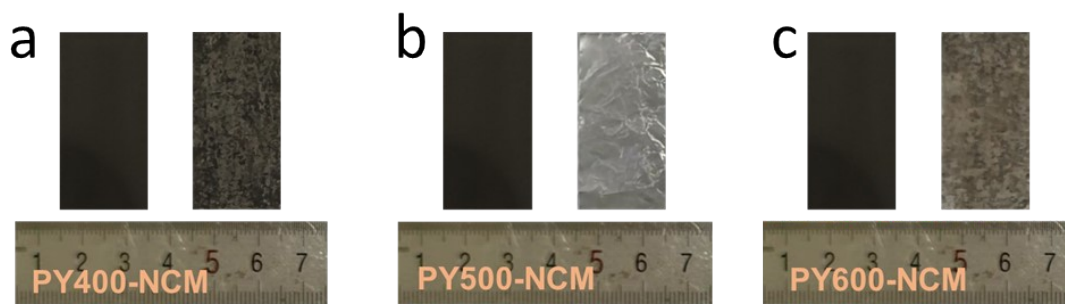

**Figure S3.** Optical photographs of NCM cathode sheets after thermal decomposition at (a) 400 °C, (b) 500 °C, and (c) 600 °C for 4 h.

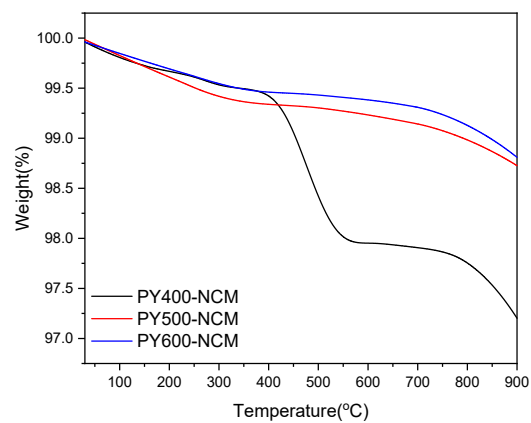

**Figure S4.** Thermogravimetric (TG) curves of PY400-NCM, PY500-NCM, and PY600-NCM samples.

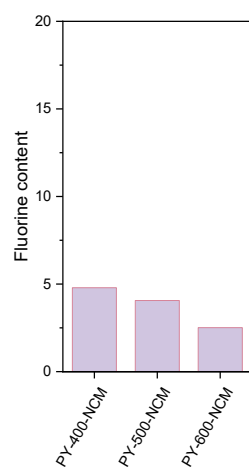

**Figure S5.** Fluoride contents of PY400-NCM, PY500-NCM, and PY600-NCM measured by ion chromatography.

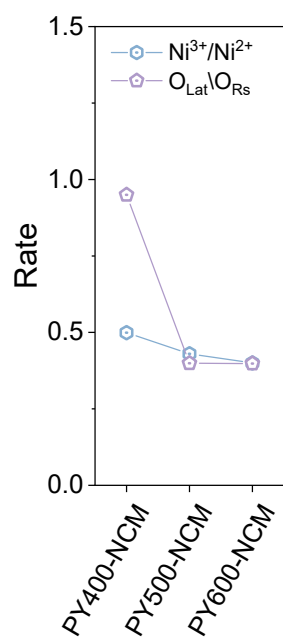

**Figure S6.** Surface Ni<sup>3+</sup>/Ni<sup>2+</sup> and O<sub>lat</sub>/O<sub>rs</sub> ratios of PY400-NCM, PY500-NCM, and PY600-NCM obtained from XPS fitting.

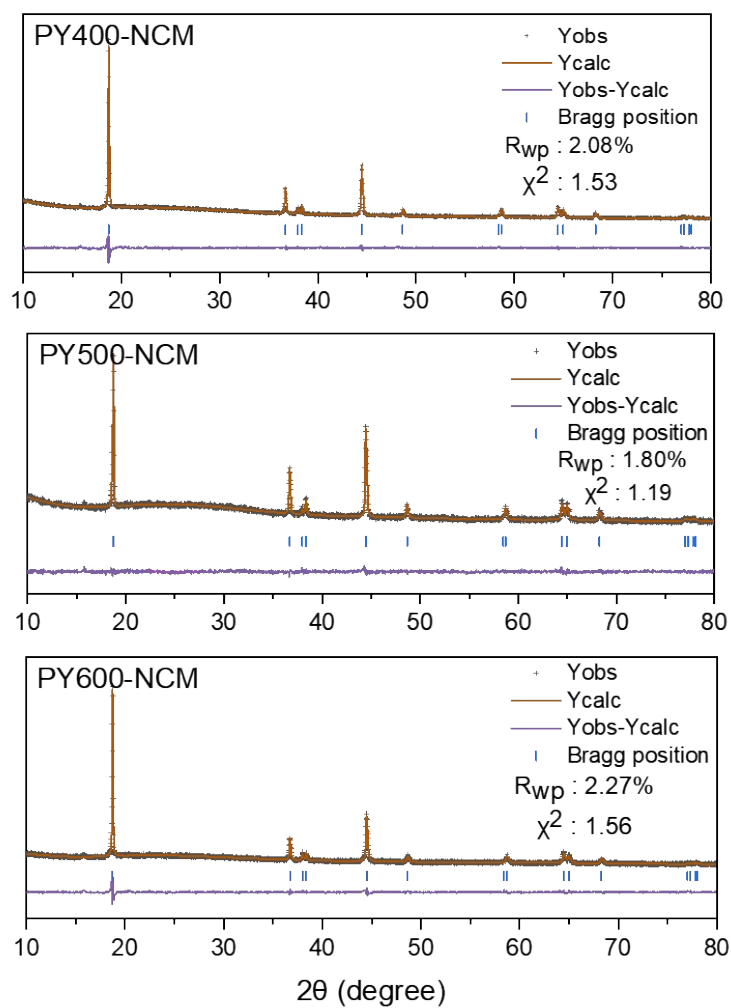

**Figure S7.** Rietveld-refined XRD patterns of PY400-NCM, PY500-NCM, and PY600-NCM.

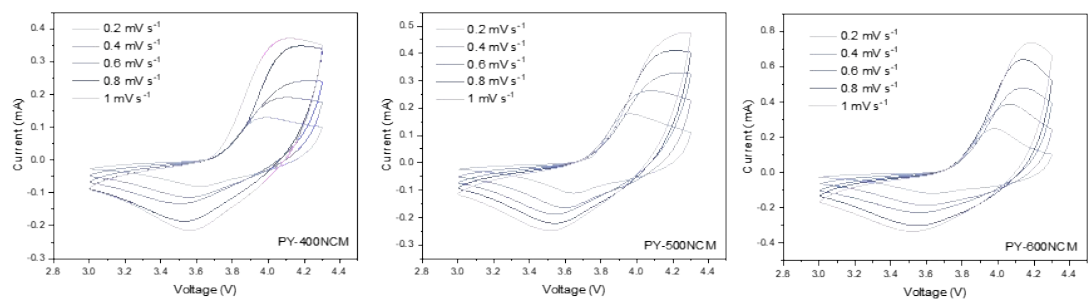

**Figure S8.** Cyclic voltammetry (CV) curves of PY400-NCM, PY500-NCM, and PY600-NCM.

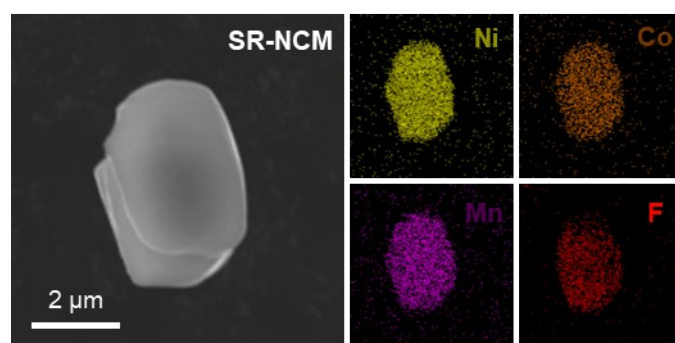

**Figure S9.** SEM image and corresponding EDS elemental mappings of SR-NCM.

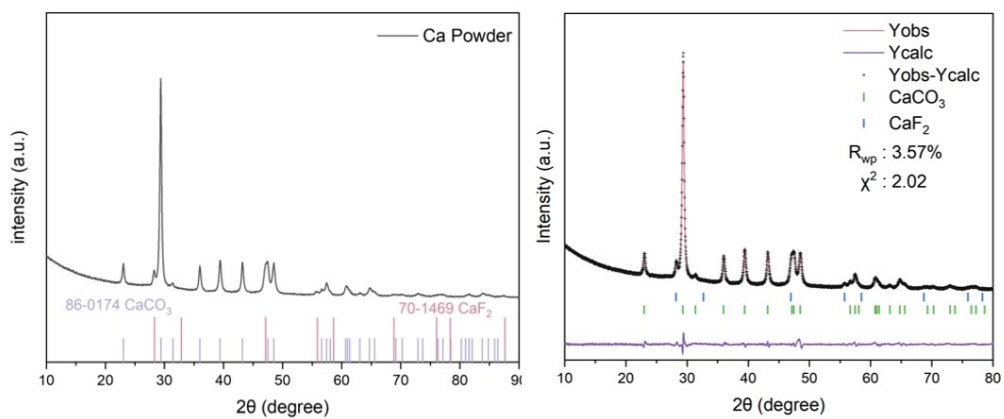

**Figure S10.** XRD pattern and Rietveld refinement of the reacted Ca powder after fluorine capture.

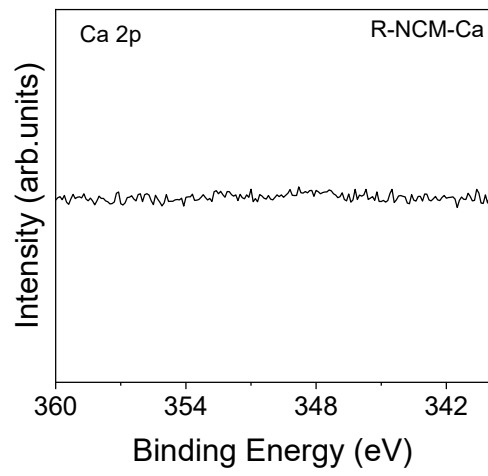

**Figure S11.** XPS Ca 2p spectrum of R-NCM-Ca.

| <b>Sample Id</b> | <b>Ca 317.933<br/>(mg/L)</b> |
|------------------|------------------------------|
| C-NCM            | 0.078                        |
| R-NCM-Ca         | 0.067                        |

**Figure S12.** ICP analysis of the elemental composition of the regenerated material and the commercial cathode material.

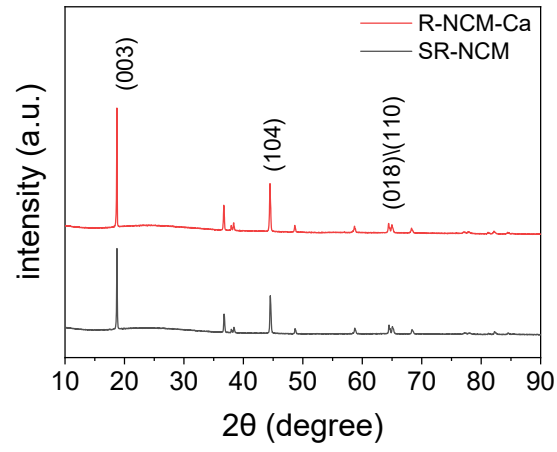

**Figure S13.** XRD patterns of SR-NCM and R-NCM-Ca.

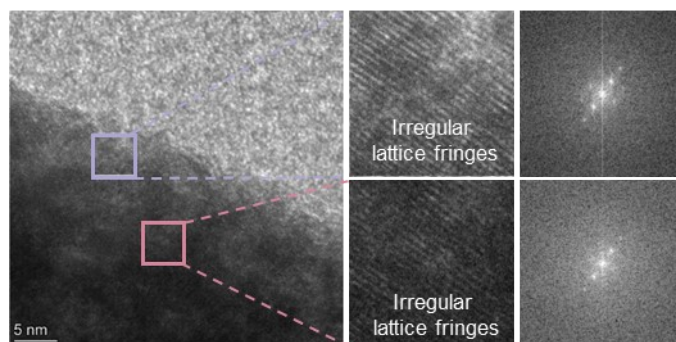

**Figure S14.** HRTEM image of SR-NCM.

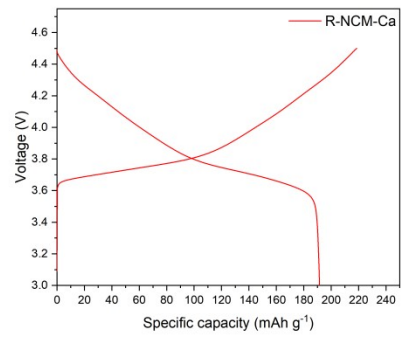

**Figure S15.** Charge–discharge curves of R-NCM-Ca measured in the voltage range of 3.0–4.5 V.

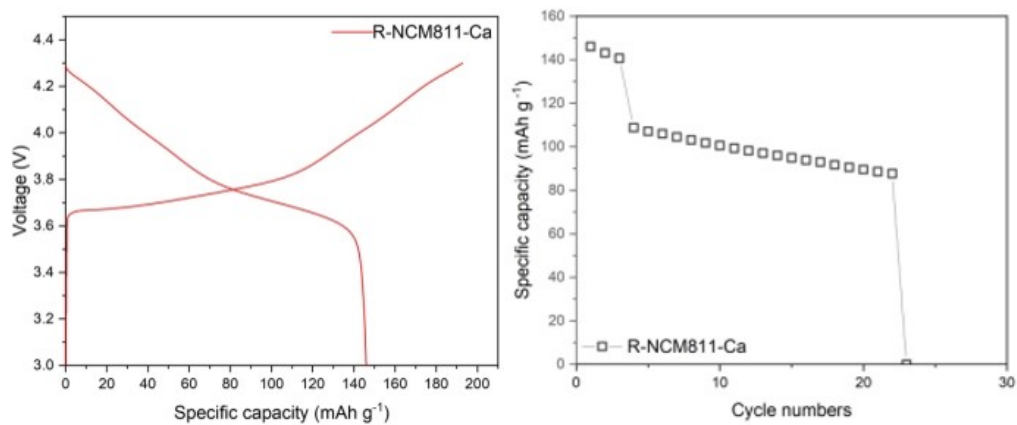

**Figure S16.** Electrochemical performance of the regenerated NCM811 cathode under the same regeneration conditions.
